# Supplementary material for: The p62-CD63 complex mediates amphisome biogenesis for secretory autophagy under oxidative stress
Source: Research Square preprint supplement (doi:10.21203/rs.3.rs-8192848/v1), 2025-12-15
Supplement: Supplementary file 1 [file 82534b8c75c5ee9aec4230bc.docx]

*Nature Cell Biology*

November 24, 2025

**The Cys/N-degron pathway mediates secretory autophagy under oxidative stress**

Su Bin Kim1*, Ji Su Lee1*, Su Jin Lee1*, Hye Yeon Kim1*, Minje Kang2, Min Ju Lee1, Ah Jung Heo3, Do Hyun Han4, Seok-Ho Hong2,5**§**, Yong Tae Kwon1,6,7,8**§**, Chang Hoon Ji1,6**§**

1Cellular Degradation Biology Center and Department of Biomedical Sciences, College of Medicine, Seoul National University, Seoul 03080, Korea.

2Department of Internal Medicine, School of Medicine, Kangwon National University, 1 Kangwondaehak-gil, Chuncheon, Gangwon‑do 24431, Korea.

3Goethe University Frankfurt, Medical Faculty, Institute of Biochemistry II, Theodor-Stern-Kai 7, 60590 Frankfurt am Main, Germany.

4Proteomics Core Facility, Biomedical Research Institute, Seoul National University Hospital, 71 Daehak-ro, Seoul 03082, Korea

5KW-Bio Co., Ltd, 32 Sichunggil-ro, Wonju, Gangwon-do 24348, Korea.

6AUTOTAC Bio Inc., 225 Gasan digital 1-ro, Seoul 08501, Korea.

7Ischemic/Hypoxic Disease Institute, Seoul National University Medical Research Center, Seoul National University, Seoul 03080, Korea.

8SNU Dementia Research Center, Medical Research Center, Seoul National University, Seoul 03080, Korea.

*****These authors equally contributed to this work.

**§Correspondence**:

Chang Hoon Ji. Department of Biomedical Sciences, College of Medicine, Seoul National University, Seoul 03080, Korea

Telephone: 82-2-6328-1121. Fax: 82-2-3673-2167. Email: [changhoon.ji@snu.ac.kr](mailto:changhoon.ji@snu.ac.kr).

Yong Tae Kwon. Department of Biomedical Sciences, College of Medicine, Seoul National University, Seoul 03080, Korea

Telephone: 82-2-740-8547. Fax: 82-2-3673-2167. Email: [yok5@snu.ac.kr](mailto:yok5@snu.ac.kr).

Seok-ho Hong. Department of Internal Medicine, School of Medicine, Kangwon University, Chuncheon, 24431, Korea

Telephone: 82-33-250-7819. Fax: 82-33-244-2367. Email: shhong@kangwon.ac.kr.

**Extended Data Figures and Figure Legends**

**
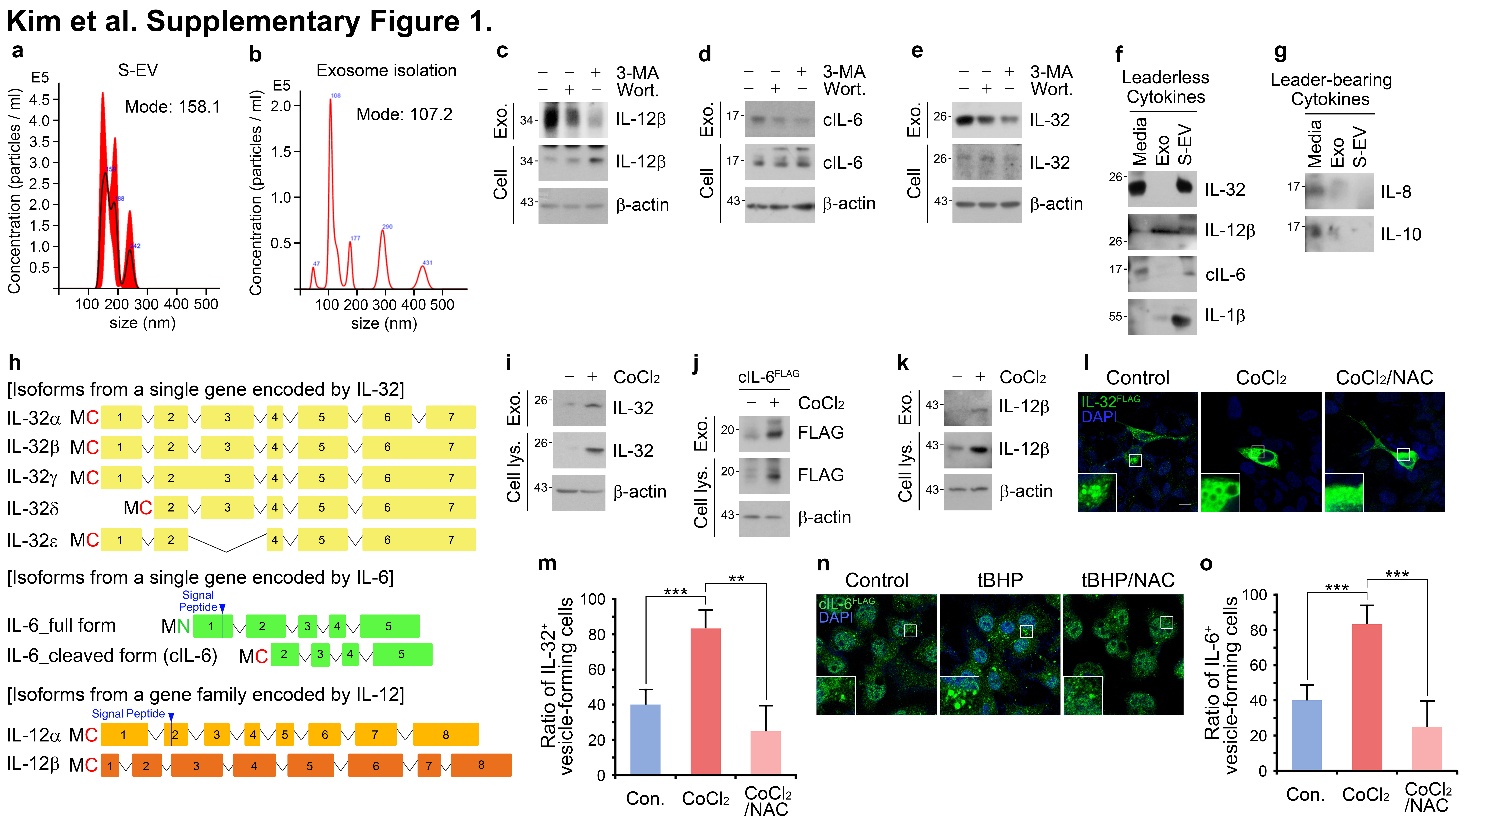
**

**Extended Data Fig. 1Nt-Cys cytokines are specifically secreted via exosomes in response to oxidative stress.a** and **b** Nanoparticle tracking analysis (NTA) distribution of exosomes purified by ultracentrifugation (S-EV) and PEG-based exosome isolation solution (Exo) from A549 cells. **c** Immunoblotting of intracellular and extracellular fractions of IL-12β in A549 cells with 3-MA (20 mM, 24 h), or wortmannin (10 µM, 24 h). **d** and **e** Same as c, but with indicated cytokines.

**f** and **g** Immunoblotting of cytokines in media precipitated by TCA and exosome fractions purified by PEG-based isolation kit (Exo) or size-exclusion fractionation (S-EV). **h** Sequences of isoforms from a gene encoded by IL-32, IL-6, and IL-12β with the indication of their N-terminal residues. **i** Immunoblotting of intracellular and extracellular fractions of IL-32 in HepG2 and A549 cells with CoCl2 (250 μM, 24 h). **j** and **k** Same as i, but with cIL-6FLAG and IL-12 in A549 cells.

**l** Immunostaining of transiently overexpressed IL-32FLAG in HeLa cells treated with CoCl2 and NAC (500 µM, 6 h). Scale bar, 10 µm. **m** Quantification of l (29 cells). **n** Immunostaining of transiently overexpressed cIL-6FLAG in HeLa cells treated with tBHP (250 µM, 6 h) and NAC. Scale bar, 10 µm. **o** Quantification of n (150 cells). Error bars represent SEM (*n* = 7 replicates). **p<0.01, ***p<0.001 using the one-way ANOVA.


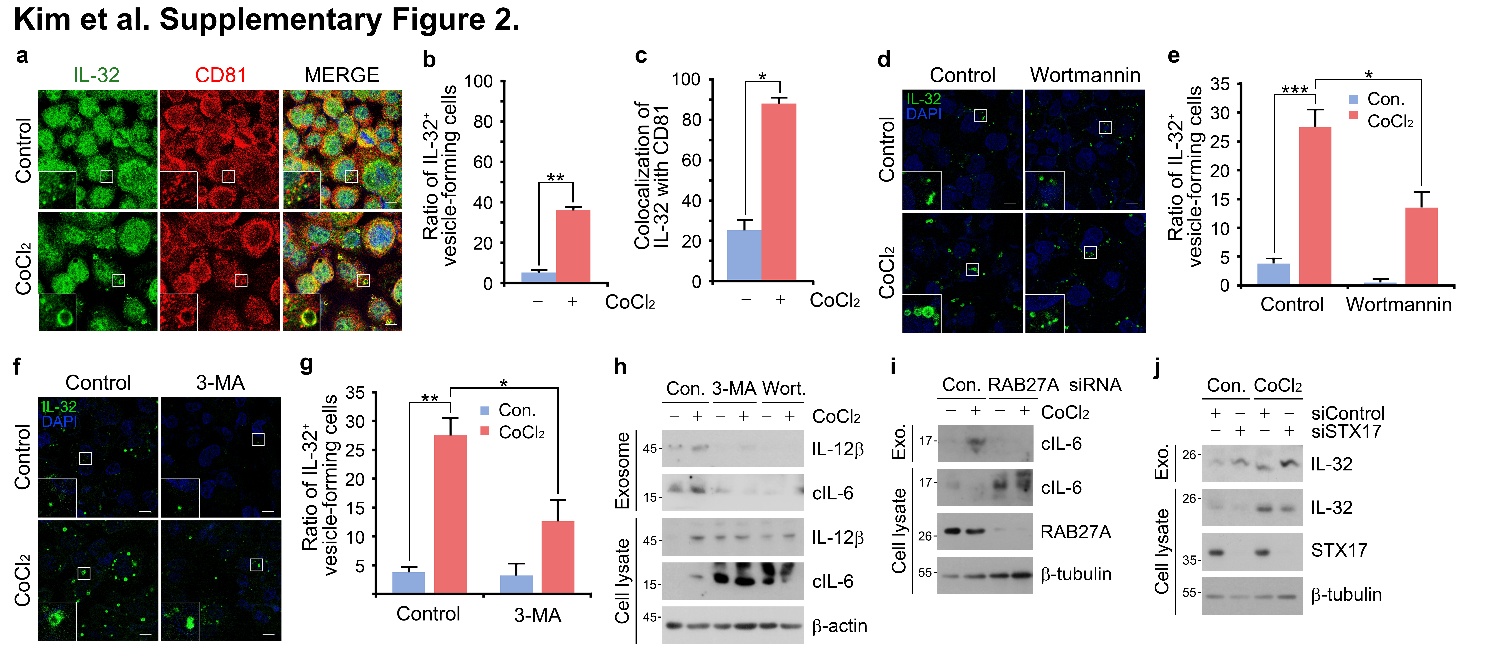


**Extended Data Fig. 2 Nt-Cys cytokines are specifically secreted via secretory autophagy in response to oxidative stress. a** Co-localization analysis in HepG2 cells treated with or without CoCl2 (250 µM, 24 h). Scale bar, 10 µm. **b** and **c** Quantification of a (102 cells). **d** Immunostaining analysis in HepG2 cells treated with CoCl2, wortmannin (10 µM, 24 h), or both. Scale bar, 10 µm. **e** Quantification of d (471 cells). **f** Same as d, but with 3-MA (20 mM, 24 h). Scale bar, 10 µm. **g** Quantification of f (348 cells). **h** Immunoblotting of intracellular and exosome fractions of cIL-6 and IL-12β in A549 cells with CoCl2, 3-MA, or wortmannin. **i** Immunoblotting of intracellular and exosome fractions of cIL-6 in A549 cells with CoCl2 under RAB27A interference. **j** Same as i, but with IL-32 in A549 cells under STX17 interference. Error bars represent SEM (*n* = 3 replicates). *p<0.05, **p<0.01, ***p<0.001 using the t-test or one-way ANOVA.


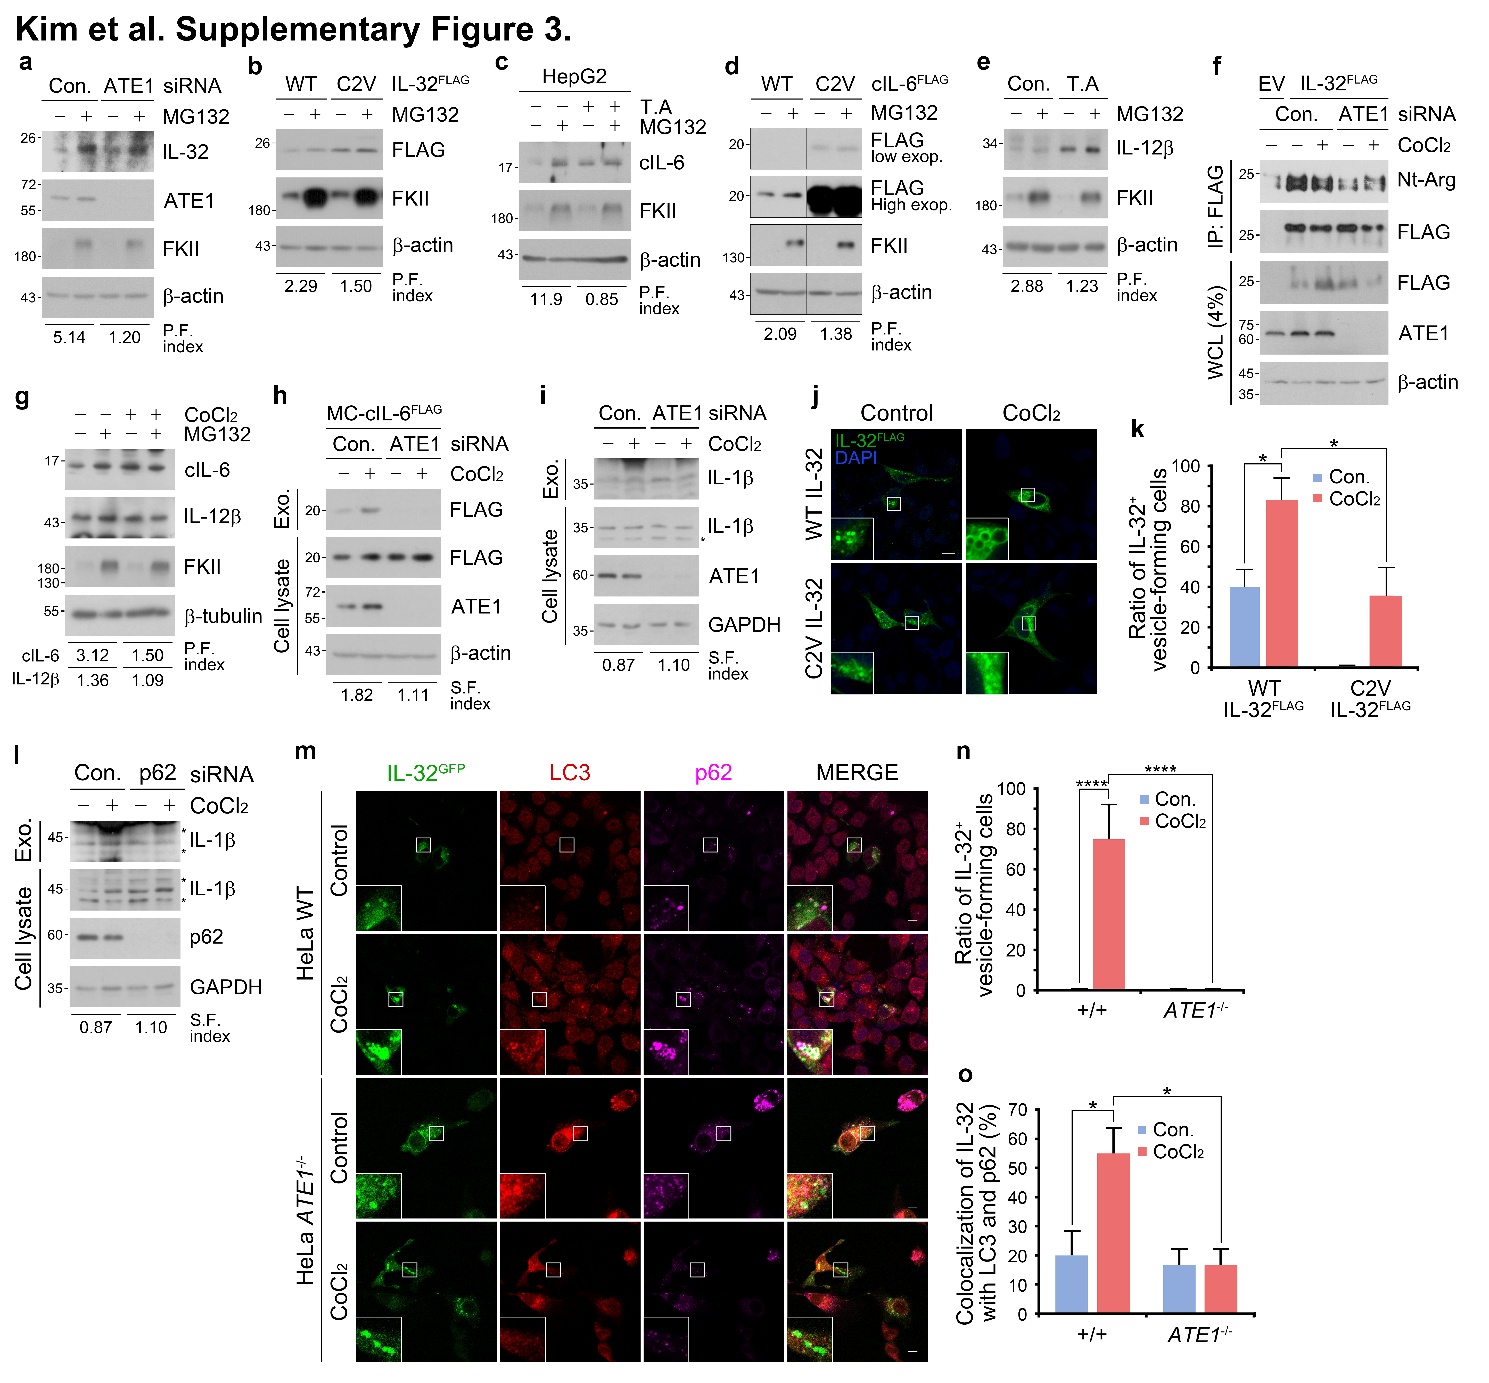


**Extended Data Fig. 3 Nt-Arginylation and p62 mediate proteolysis and secretion of Nt-Cys cytokines. a** Immunoblotting of endogenous IL-32 in A549 cells with MG132 (10 μM, 6 h) under ATE1 interference compared to control. **b** Immunoblotting of HEK 293T cells transfected with wild-type or C2V-IL-32FLAG and treated with MG132. **c** Immunoblotting of endogenous cIL-6 in HepG2 cells with MG132, tannic acid (30 μM, 24 h), or both. **d** Same as b, but transfected with wild-type or C2V-cIL-6FLAG and treated with MG132. **e** Same as c, but with IL-12β in A549 cells. **f** Co-IP of Nt-Arg of IL-32 in HEK293T cells transfected with IL-32FLAG and CoCl2 (250 μM, 24 h) treatment under ATE1 siRNA compared to control. **g** Immunoblotting analysis of cIL-6 and IL-12β with the treatment of MG132, CoCl2, or both. **h** Immunoblotting of intracellular and exosome fractions of cIL-6 in MC-cIL6FLAG expressing A549 cells with CoCl2 under ATE1 interference. **i** Same as h, but immunoblotting of IL-1β in A549 cells. **j** Immunostaining of IL-32 in wild-type and C2V mutant IL-32FLAG expressing HeLa cells with CoCl2. Scale bar, 10 µm. **k** Quantification of j (220 cells). **l** Same as i, but under p62 siRNA interference. **m** Immunostaining of IL-32, LC3, and p62 in IL-32GFP expressing Wild-type and ATE1-/- HeLa cells with CoCl2. Scale bar, 10 µm. **n**-**o** Quantification of m (280 cells). Error bars represent SEM (*n* = 7~8 replicates). *p<0.05, ****p<0.0001 using the one-way ANOVA or t-test.


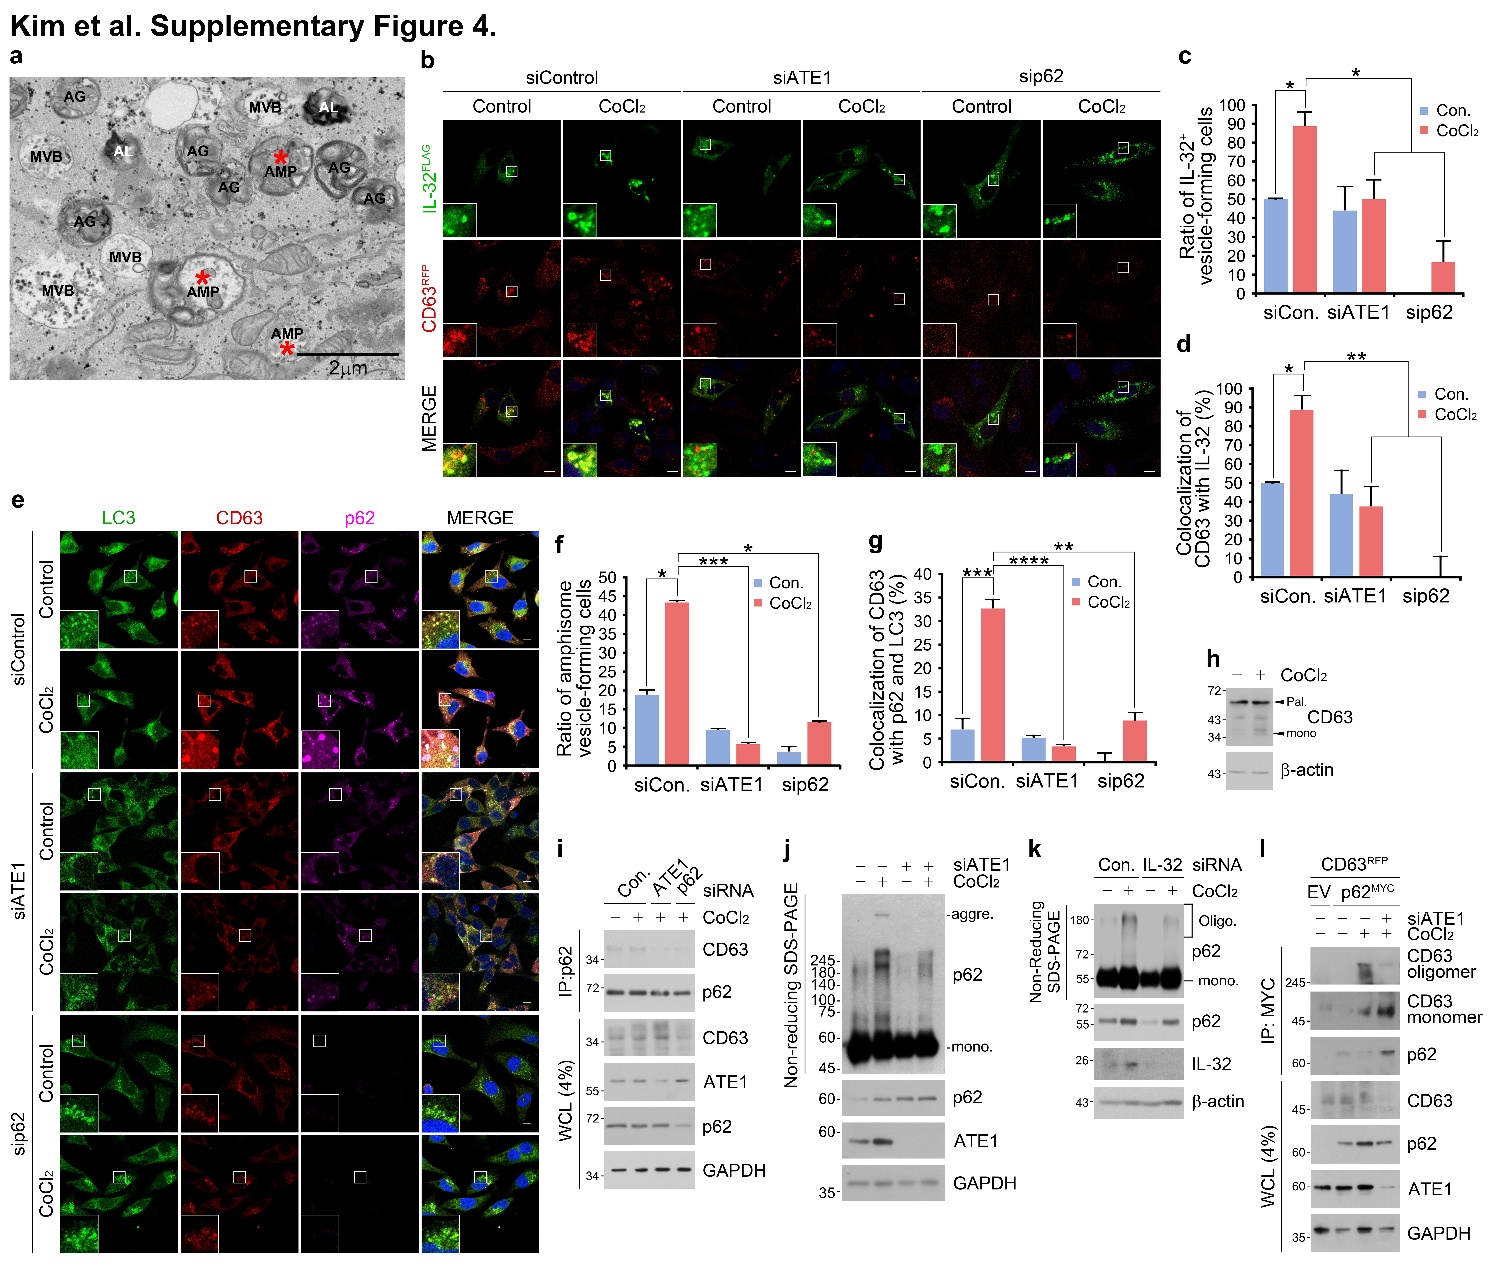


**Extended Data Fig. 4 p62 and CD63 are required for the biogenesis of amphisomes and IL-32 targeting under oxidative stress. a** Definition of transmission electron microscopy (TEM) structure of cytosolic vesicles in A549 cells with the treatment of CoCl2 (250 μM, 24 h). Scale bar, 2 µm. **b** Colocalization assay of IL-32 and CD63 in IL-32FLAG, CD63RFP-transfected HeLa cells with treatment of CoCl2 and genetic interference of ATE1 or p62. Scale bar, 10 µm. **c** and **d** Quantification of b (320 cells). **e** Co-localization analysis of LC3, CD63, and p62 in CD63RFP-transfected HeLa cells with CoCl2 treatment under ATE1 or p62 siRNA interference. Scale bar, 10 µm. **f** and **g** Quantification of e (692 cells). **h** Immunoblotting of CD63 in A549 cells with CoCl2 treatment. **i** Co-IP of p62 with CD63 in A549 cells with CoCl2 under ATE1 and p62 siRNA interference. **j** p62 oligomerization assay in A549 cells with CoCl2 under ATE1 siRNA interference. **k** Same as j, but under IL-32 siRNA interference. **l** Co-IP of p62 with oligomeric CD63 in p62MYC and CD63RFP overexpressed A549 cells with CoCl2 under ATE1 siRNA interference. Error bars represent SEM (*n* = 5~6 replicates). *p<0.05, **p<0.01, ****p<0.0001 using one-way ANOVA or t-test.


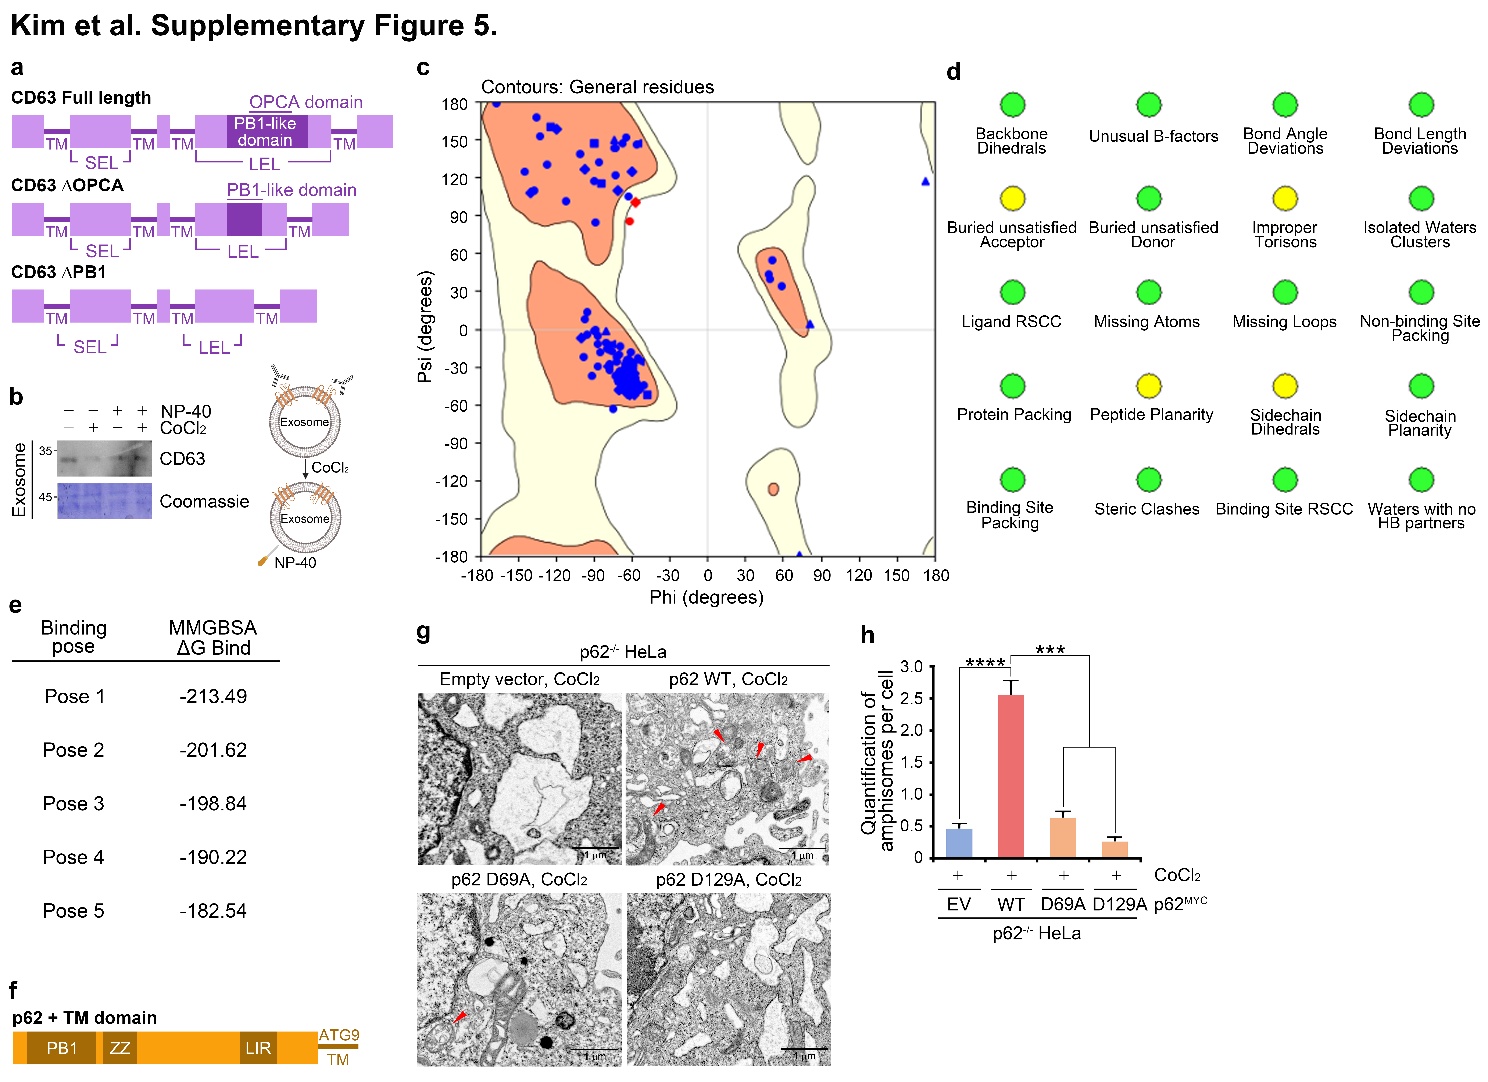


**Extended Data Fig. 5 p62 oligomerization is required for the biogenesis of amphisomes under oxidative stress. a** Schematic of recombinant CD63 constructs. **b** Immunoblotting of the exosomal CD63 originated from A549 in the presence or absence of CoCl2 (250 μM, 24 h) using a CD63 antibody whose epitope is the CD63 LEL domain. Exosomes were permeabilized with 10 % NP-40 in digitonin-based lysis buffer. **c** The Ramachandran plots of the modeled CD63 structure generated by Alphafold 3. **d** Structure reliability analysis of the modeled CD63 structure generated by Alphafold 3. **e** MMGBSA G bind scores (kcal/mol) of the top 5 binding poses of p62 PB1 domain and CD63 PB1 domain. **f** Schematic of the p62 construct inserted with the ATG9 TM domain. **g** TEM of A549 cells transfected with WT, D69A, or D129A p62 and treatment of CoCl2 (250 μM, 24 h) compared to control. The amphisomes or MVBs are indicated by red arrows. Scale bars, 1 μm. **h** Quantification of g (188 cells). Error bars represent SEM (*n* = 3 replicates). ***p<0.001, ****p<0.0001 using the paired t-test.


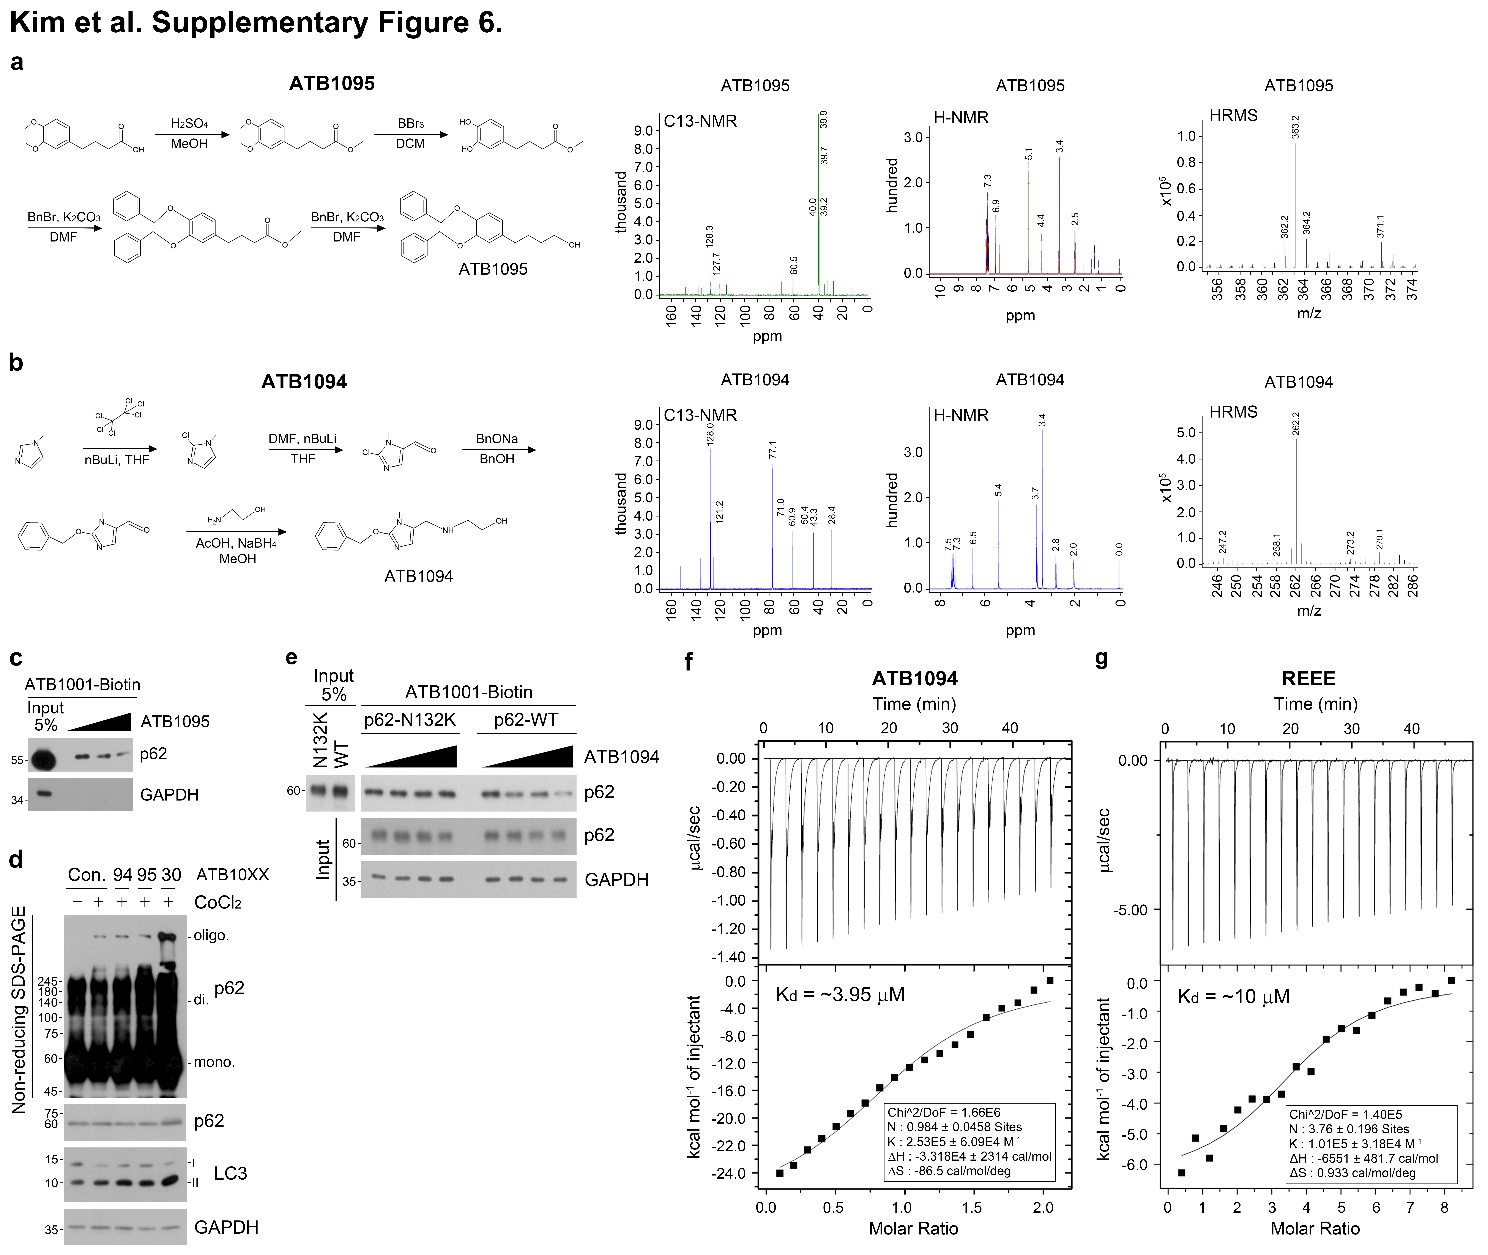


**Extended Data Fig. 6 Characterization of p62 antagonists. a** and **b** Synthesis processes, C13-NMR, H-NMR, and HRMS of ATB1095 and ATB1094. Reagents and conditions are described in the ‘Materials and Methods’ section. **c** Competitive pulldown assay of p62MYC plasmid overexpressed lysate from 293T cells with a serial concentration of ATB1095 (2 h). **d** Immunoblotting of oligomer and monomer of p62 in A549 cells with CoCl2 (250 μM, 24 h), ATB1094, ATB1095, or ATB1030 (10 μM, 24 h). **e** Same as c, but with wild-type or N132K p62MYC plasmid overexpressed lysate from HEK293T cells. **f** and **g** Isothermal titration calorimetry (ITC) of ATB1094 and REEE peptide.


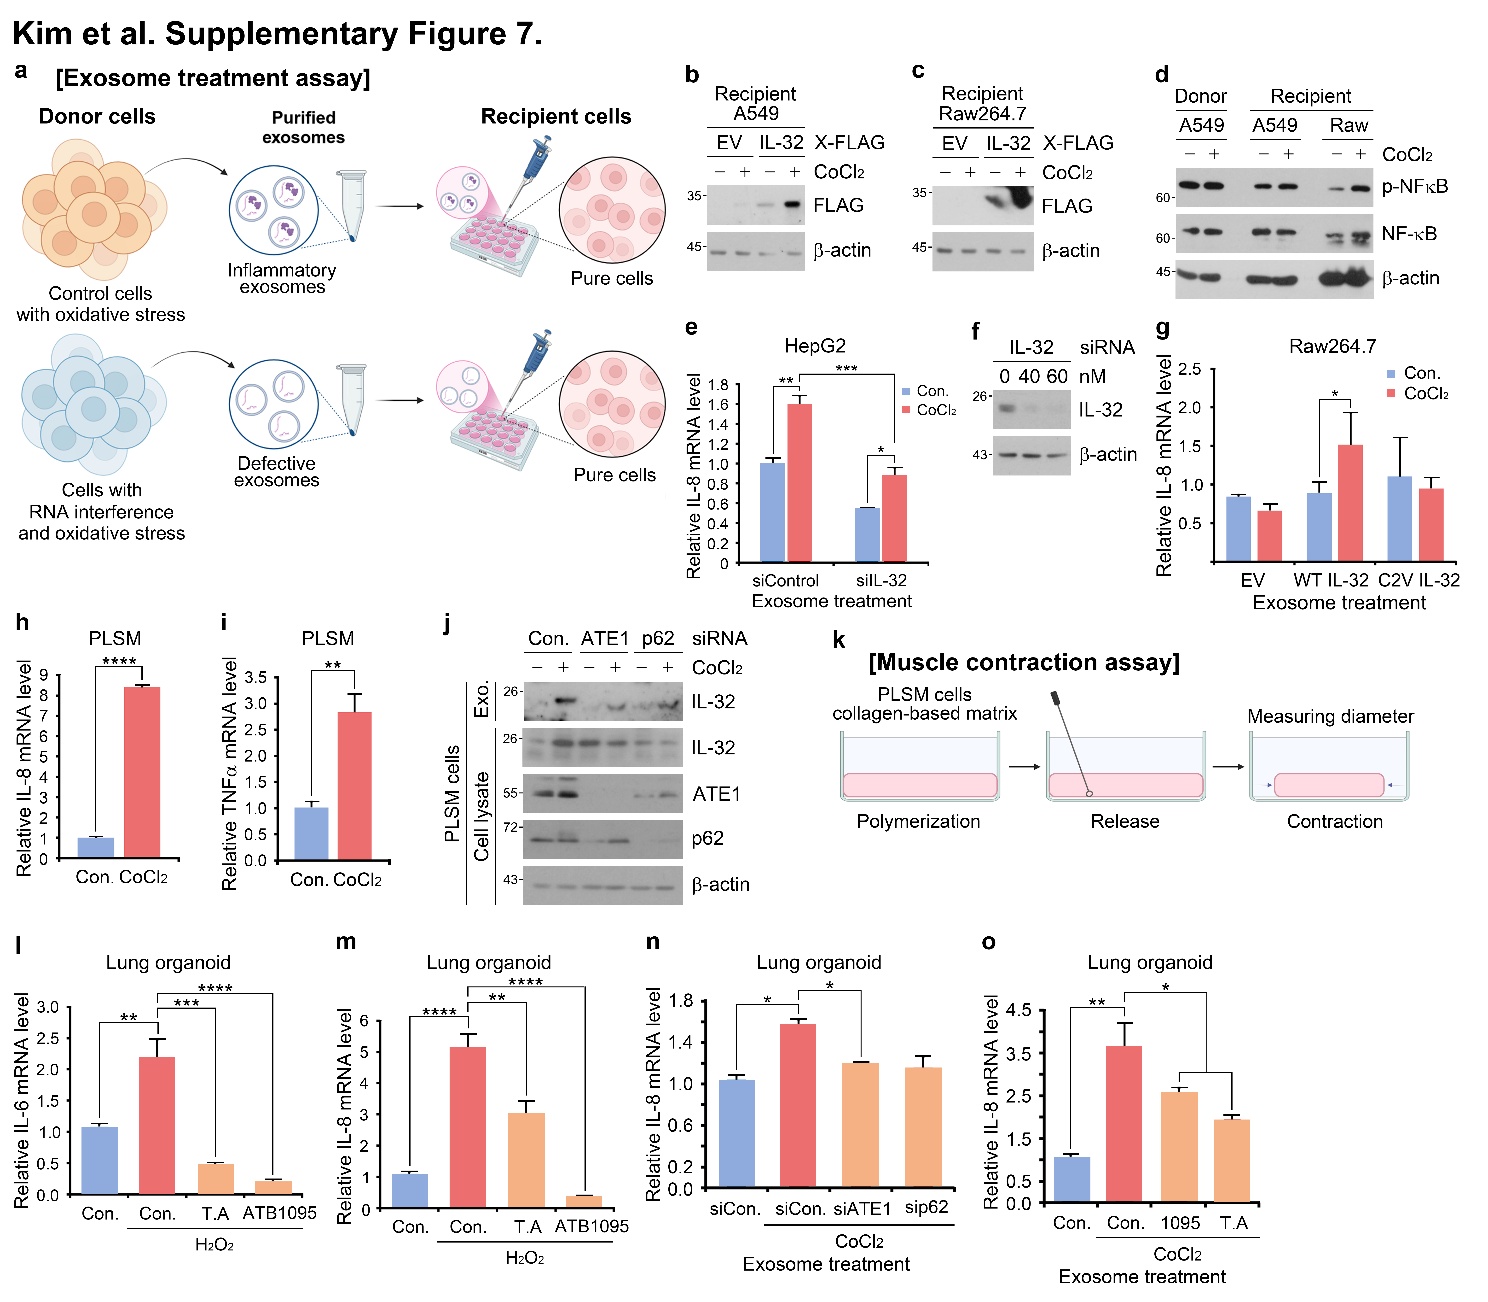


**Extended Data Fig. 7 The Arg/N-degron pathway regulates paracrine inflammatory signaling in oxidative stress-induced lung inflammatory models. a** Description of the sample preparation of the exosome treatment assay (ETA). **b** Immunoblotting of IL-32 and IL-6 in A549 cells treated with exosomes originating from IL-32FLAG or cIL-6FLAG-transfected Raw264.7 cells with CoCl2 (250 μM, 24 h). **c** Same as b, but in Raw264.7 cells. **d** Immunoblotting of p-NF-B, NF-B in donor A549 cells in the absence or presence of CoCl2 and recipient A549 and Raw264.7 cells. **e** Relative mRNA level of IL-8 in HepG2 cells treated with exosomes originating from cells under IL-32 knockdown and CoCl2 treatment compared with control. **f** Immunoblotting of IL-32 in HepG2 cells under dose-dependent IL-32 interference compared to control. **g** Relative mRNA level of IL-8 in Raw264.7 cells treated with exosomes originating from wild-type and C2V IL-32FLAG-transfected cells with CoCl2. **h** Relative mRNA level of IL-8 in PLSM cells treated with or without CoCl2. **i** Same as h, but with TNF. **j** Immunoblotting of intracellular and extracellular fractions of IL-32, ATE1, and p62 in PLSM cells under ATE1 or p62 interference compared to control. **k** Schematic illustration of the muscle cell contraction assay. **l** Relative mRNA level of IL-6 in lung organoids treated with H2O2 (500 μM, 21 h), tannic acid (30 μM, 24 h), or ATB1095 (10 μM, 24 h). **m** Same as l, but with IL-8. **n** Relative mRNA level of IL-8 in lung alveolar organoids treated with exosomes originating from cells under ATE1orp62 knockdown and CoCl2 treatment compared with control. **o** Same as n, but with CoCl2, ATB1095, and tannic acid. Error bars represent SEM (*n* = 3 replicates). *p<0.05, **p<0.01, ***p<0.001, ****p<0.0001 using the one-way ANOVA or t-test.
